# Supplementary material for: An early female lethal system of the New World screwworm, Cochliomyia hominivorax, for biotechnology-enhanced SIT
Source: PubMed Central journal article supplement (PMC7747452; doi:10.1186/s12863-020-00948-x), 2020-12-18
Supplement: 12863_2020_948_MOESM1_ESM.pdf [file 12863_2020_948_MOESM1_ESM.pdf]

**Additional file 1.**  
**Heterozygous female lethality in two-component Driver-Effector combinations.**

| HETEROZYGOUS TRANSGENIC LINES |          |     |          |         |        |          |          |         |       |
|-------------------------------|----------|-----|----------|---------|--------|----------|----------|---------|-------|
| Driver                        | Effector | TET | Bottle # | # pupae | # male | # female | % female | Average | StDev |
| DR2-4                         | EF1-16   | NO  | 1        | 244     | 206    | 26       | 11.21%   | 6.57%   | 4.76% |
|                               |          |     | 2        | 191     | 173    | 6        | 3.35%    |         |       |
|                               |          |     | 3        | 227     | 201    | 12       | 5.63%    |         |       |
|                               |          |     | 4        | 173     | 124    | 18       | 12.68%   |         |       |
|                               |          |     | 5        | 54      | 49     | 0        | 0.00%    |         |       |
|                               | YES      | 1   | 26       | 11      | 13     | 54.17%   | 47.66%   | 6.37%   |       |
|                               |          | 2   | 249      | 129     | 82     | 38.86%   |          |         |       |
|                               |          | 3   | 378      | 165     | 188    | 53.26%   |          |         |       |
|                               |          | 4   | 342      | 172     | 137    | 44.34%   |          |         |       |
|                               |          |     |          |         |        |          |          |         |       |
| DR2-8                         | EF1-16   | NO  | 1        | 125     | 91     | 0        | 0.00%    | 0.00%   | 0.00% |
|                               |          |     | 2        | 37      | 34     | 0        | 0.00%    |         |       |
|                               |          |     | 3        | 44      | 44     | 0        | 0.00%    |         |       |
|                               |          |     | 4        | 84      | 69     | 0        | 0.00%    |         |       |
|                               |          |     | 5        | 122     | 120    | 0        | 0.00%    |         |       |
|                               |          |     | 6        |         |        |          |          |         |       |
|                               | YES      | 1   | 605      | 294     | 298    | 50.34%   | 49.99%   | 0.34%   |       |
|                               |          | 2   | 154      | 72      | 71     | 49.65%   |          |         |       |
|                               |          | 3   |          |         |        |          |          |         |       |
|                               |          | 4   |          |         |        |          |          |         |       |
| 5                             |          |     |          |         |        |          |          |         |       |
| DR2-11A                       | EF1-16   | NO  | 1        | 290     | 241    | 1        | 0.41%    | 0.35%   | 0.41% |
|                               |          |     | 2        | 364     | 349    | 0        | 0.00%    |         |       |
|                               |          |     | 3        | 238     | 184    | 0        | 0.00%    |         |       |
|                               |          |     | 4        | 291     | 197    | 2        | 1.01%    |         |       |
|                               | YES      | 1   | 502      | 180     | 180    | 50.00%   | 50.12%   | 0.12%   |       |
|                               |          | 2   | 693      | 309     | 312    | 50.24%   |          |         |       |
|                               |          | 3   |          |         |        |          |          |         |       |
|                               |          | 4   |          |         |        |          |          |         |       |
|                               |          |     |          |         |        |          |          |         |       |
|                               |          |     |          |         |        |          |          |         |       |
| DR2-11B                       | EF1-16   | NO  | 1        | 28      | 28     | 0        | 0.00%    | 0.00%   | 0.00% |
|                               |          |     | 2        | 41      | 41     | 0        | 0.00%    |         |       |
|                               |          |     | 3        | 52      | 48     | 0        | 0.00%    |         |       |
|                               |          |     | 4        |         |        |          |          |         |       |
|                               | YES      | 1   | 156      | 78      | 72     | 48.00%   | 50.03%   | 1.83%   |       |
|                               |          | 2   | 320      | 147     | 145    | 49.66%   |          |         |       |
|                               |          | 3   | 361      | 166     | 183    | 52.44%   |          |         |       |
|                               |          | 4   |          |         |        |          |          |         |       |
| DR2-17                        | EF1-16   | NO  | 1        | 166     | 114    | 0        | 0.00%    | 0.00%   | 0.00% |
|                               |          |     | 2        | 160     | 156    | 0        | 0.00%    |         |       |
|                               |          |     | 3        | 180     | 151    | 0        | 0.00%    |         |       |
|                               |          |     | 4        | 179     | 124    | 0        | 0.00%    |         |       |
|                               |          |     | 5        | 190     | 175    | 0        | 0.00%    |         |       |
|                               |          |     | 6        |         |        |          |          |         |       |
|                               | YES      | 1   | 425      | 167     | 203    | 54.86%   | 49.86%   | 3.55%   |       |
|                               |          | 2   | 106      | 46      | 42     | 47.73%   |          |         |       |
|                               |          | 3   | 107      | 44      | 39     | 46.99%   |          |         |       |
|                               |          | 4   |          |         |        |          |          |         |       |
|                               |          | 5   |          |         |        |          |          |         |       |
|                               |          | 6   |          |         |        |          |          |         |       |

|        |        |     |   |     |     |     |        |        |        |
|--------|--------|-----|---|-----|-----|-----|--------|--------|--------|
| DR2-21 | EF1-16 | NO  | 1 | 88  | 80  | 0   | 0.00%  | 0.85%  | 1.21%  |
|        |        |     | 2 | 80  | 76  | 2   | 2.56%  |        |        |
|        |        |     | 3 | 25  | 25  | 0   | 0.00%  |        |        |
|        |        |     | 4 |     |     |     |        |        |        |
|        |        | YES | 1 | 114 | 57  | 43  | 43.00% | 48.97% | 5.97%  |
|        |        |     | 2 | 93  | 41  | 50  | 54.95% |        |        |
|        |        |     | 3 |     |     |     |        |        |        |
|        |        |     | 4 |     |     |     |        |        |        |
| DR2-17 | EF1-19 | NO  | 1 | 186 | 147 | 31  | 17.42% | 13.65% | 6.04%  |
|        |        |     | 2 | 200 | 124 | 28  | 18.42% |        |        |
|        |        |     | 3 | 41  | 37  | 2   | 5.13%  |        |        |
|        |        |     | 4 |     |     |     |        |        |        |
|        |        | YES | 1 | 855 | 592 | 218 | 26.91% | 36.50% | 7.62%  |
|        |        |     | 2 | 392 | 192 | 113 | 37.05% |        |        |
|        |        |     | 3 | 108 | 55  | 46  | 45.54% |        |        |
|        |        |     | 4 |     |     |     |        |        |        |
| DR2-17 | EF1-6B | NO  | 1 | 136 | 122 | 16  | 11.59% | 8.36%  | 5.96%  |
|        |        |     | 2 | 181 | 122 | 19  | 13.48% |        |        |
|        |        |     | 3 | 60  | 56  | 0   | 0.00%  |        |        |
|        |        |     | 4 |     |     |     |        |        |        |
|        |        | YES | 1 | 232 | 92  | 109 | 54.23% | 52.69% | 3.23%  |
|        |        |     | 2 | 119 | 43  | 40  | 48.19% |        |        |
|        |        |     | 3 | 190 | 55  | 69  | 55.65% |        |        |
|        |        |     | 4 |     |     |     |        |        |        |
| DR2-21 | EF1-6B | NO  | 1 | 48  | 35  | 0   | 0.00%  | 0.00%  | 0.00%  |
|        |        |     | 2 | 44  | 38  | 0   | 0.00%  |        |        |
|        |        |     | 3 | 48  | 36  | 0   | 0.00%  |        |        |
|        |        |     | 4 |     |     |     |        |        |        |
|        |        |     | 5 |     |     |     |        |        |        |
|        |        | YES | 1 | 178 | 65  | 86  | 56.95% | 53.89% | 3.07%  |
|        |        |     | 2 | 150 | 120 | 124 | 50.82% |        |        |
|        |        |     | 3 |     |     |     |        |        |        |
|        |        |     | 4 |     |     |     |        |        |        |
|        |        |     | 5 |     |     |     |        |        |        |
| TD1    |        | NO  | 1 | 339 | 296 | 0   | 0.00%  | 0.00%  | 0.00%  |
|        |        |     | 2 | 294 | 261 | 0   | 0.00%  |        |        |
|        |        |     | 3 | 330 | 298 | 0   | 0.00%  |        |        |
|        |        |     | 4 |     |     |     |        |        |        |
|        |        | YES | 1 | 483 | 219 | 201 | 47.86% | 48.30% | 0.46%  |
|        |        |     | 2 | 522 | 215 | 206 | 48.93% |        |        |
|        |        |     | 3 | 560 | 219 | 203 | 48.10% |        |        |
|        |        |     | 4 |     |     |     |        |        |        |
| J06    |        | NO  | 1 | 715 | 358 | 335 | 48.34% | 48.59% | 0.38%  |
|        |        |     | 2 | 789 | 348 | 336 | 49.12% |        |        |
|        |        |     | 3 | 770 | 380 | 355 | 48.30% |        |        |
|        |        |     | 4 |     |     |     |        |        |        |
|        |        | YES | 1 | 667 | 377 | 266 | 41.37% | 46.29% | 11.24% |
|        |        |     | 2 | 289 | 157 | 87  | 35.66% |        |        |
|        |        |     | 3 | 951 | 329 | 533 | 61.83% |        |        |
|        |        |     | 4 |     |     |     |        |        |        |

**Homozygous female lethality in two-component Driver-Effector combination.**

| HOMOZYGOUS TRANSGENIC LINES |          |     |          |         |        |          |            |            |            |            |
|-----------------------------|----------|-----|----------|---------|--------|----------|------------|------------|------------|------------|
| Driver                      | Effector | TET | Bottle # | # pupae | # male | # female | % female   | Average    | StDev      |            |
| DR2-8                       | EF1-16   | NO  | 1        | 122     | 81     | 7        | 7.95454545 | 9.94506548 | 3.76340984 |            |
|                             |          |     | 2        | 25      | 18     | 3        | 14.2857143 |            |            |            |
|                             |          |     | 3        | 99      | 73     | 6        | 7.59493671 |            |            |            |
|                             |          |     | YES      | 1       | 151    | 55       | 75         | 57.6923077 | 51.7325017 | 5.77866597 |
|                             |          |     |          | 2       | 102    | 56       | 48         | 46.1538462 |            |            |
|                             |          |     |          | 3       | 39     | 18       | 19         | 51.3513514 |            |            |
| DR2-11A                     | EF1-16   | NO  | 1        | 236     | 105    | 0        | 0          | 0          |            |            |
|                             |          |     | 2        | 240     | 114    | 0        | 0          |            |            |            |
|                             |          |     | 3        | 167     | 129    | 0        | 0          |            |            |            |
|                             |          |     | 4        | 144     | 117    | 0        | 0          |            |            |            |
|                             |          |     | YES      | 1       | 273    | 97       | 109        | 52.9126214 | 51.434796  | 2.25715118 |
|                             |          |     |          | 2       | 278    | 139      | 131        | 48.5185185 |            |            |
|                             |          |     |          | 3       | 420    | 180      | 186        | 50.8196721 |            |            |
|                             |          |     |          | 4       | 275    | 100      | 115        | 53.4883721 |            |            |
| DR2-17                      | EF1-16   | NO  | 1        | 141     | 134    | 0        | 0          | 0          |            |            |
|                             |          |     | 2        | 255     | 237    | 0        | 0          |            |            |            |
|                             |          |     | 3        | 111     | 91     | 0        | 0          |            |            |            |
|                             |          |     | YES      | 1       | 206    | 91       | 72         | 44.1717791 | 46.2956679 | 1.87612005 |
|                             |          |     |          | 2       | 106    | 46       | 42         | 47.7272727 |            |            |
|                             |          |     |          | 3       | 107    | 44       | 39         | 46.9879518 |            |            |
| DR2-21                      | EF1-16   | NO  | 1        | 244     | 206    | 0        | 0          | 0.37664783 | 0.65237319 |            |
|                             |          |     | 2        | 105     | 81     | 0        | 0          |            |            |            |
|                             |          |     | 3        | 237     | 175    | 2        | 1.1299435  |            |            |            |
|                             |          |     | 4        |         |        |          |            |            |            |            |
|                             |          |     | YES      | 1       | 352    | 122      | 127        | 51.0040161 | 49.9637057 | 2.63279998 |
|                             |          |     |          | 2       | 388    | 175      | 155        | 46.969697  |            |            |
|                             |          |     |          | 3       | 472    | 163      | 176        | 51.9174041 |            |            |
|                             |          |     |          | 4       |        |          |            |            |            |            |
| DR2-17                      | EF1-6B   | NO  | 1        | 225     | 189    | 0        | 0          | 0          |            |            |
|                             |          |     | 2        | 315     | 263    | 0        | 0          |            |            |            |
|                             |          |     | 3        | 247     | 181    | 0        | 0          |            |            |            |
|                             |          |     | 4        | 176     | 154    | 0        | 0          |            |            |            |
|                             |          |     | YES      | 1       | 369    | 103      | 135        | 56.7226891 | 53.2325857 | 3.85230289 |
|                             |          |     |          | 2       | 445    | 119      | 139        | 53.875969  |            |            |
|                             |          |     |          | 3       | 283    | 113      | 109        | 49.0990991 |            |            |
|                             |          |     |          | 4       |        |          |            |            |            |            |
| TD1                         |          | NO  | 1        | 266     | 45     | 0        | 0          | 0          |            |            |
|                             |          |     | 2        | 155     | 119    | 0        | 0          |            |            |            |
|                             |          |     | 3        | 158     | 101    | 0        | 0          |            |            |            |
|                             |          |     | YES      | 1       | 247    | 86       | 68         | 44.1558442 | 46.3361533 | 5.36453242 |
|                             |          |     |          | 2       | 387    | 182      | 134        | 42.4050633 |            |            |
|                             |          |     |          | 3       | 194    | 68       | 75         | 52.4475524 |            |            |
| J06                         |          | NO  | 1        | 358     | 335    | 48.3     | 12.6010957 | 12.435132  | 0.42295495 |            |
|                             |          |     | 2        | 348     | 336    | 49.1     | 12.7499351 |            |            |            |
|                             |          |     | 3        | 380     | 355    | 48.2     | 11.9543651 |            |            |            |
|                             |          |     | YES      | 1       | 377    | 266      | 35.8       | 11.8621604 | 17.0965759 | 10.3673234 |
|                             |          |     |          | 2       | 157    | 87       | 35.6       | 29.0375204 |            |            |
|                             |          |     |          | 3       | 329    | 533      | 61.8       | 10.3900471 |            |            |
